# Supplementary material for: Cerebral Small Vessel Disease Score Associated with Brain Hypoperfusion Predicts Cognitive Decline: A Longitudinal Study
Source: Research Square preprint supplement (doi:10.21203/rs.3.rs-6746909/v1), 2025-06-10
Supplement: Supplementary file 1 [file 2832145473ee016a54392ef6.docx]

**Supplement Table S1.** Scoring system for total CSVD burden.

| MRI markers | Visual assessment reference | Definition and description | Degree | Score |
| --- | --- | --- | --- | --- |
| WMH | Fazekas scale | WMHs were defined as hyperintensity both on T2-weighted and FLAIR sequences and without diffusion limitation or leukomalacia.  Periventricular WMHs were graded as: 0 = absent, 1 = caps or pencil-thin lining, 2 = smooth halo, or 3 = irregular peri-ventricular WMHs extending into the deep white matter. Deep WMHs were graded as: 0 = absent, 1 = punctate foci, 2 = beginning confluent foci, or 3 = large confluent areas. | Fazekas score ≥ 2 in the deep WM or =3 in the periventricular WM | 1 |
| PVS | Semi-quantitative scale | PVSs in the basal ganglia were round or ovoid, with a diameter generally ≤ 3 mm and had signal intensity similar to cerebrospinal fluid on all sequences.  PVSs visible unilaterally in the basal ganglia were counted, and the more severe side was taken into account when bilateral asymmetry was present | Number ≥ 11 or category ≥ 2 | 1 |
| Lacune | Consensus definition | Lacune was defined as a round or ovoid, subcortical, fluid-filled cavity of between 3 -15 mm with a characteristic rim-like hyperintensity on FLAIR sequences. | ≥ 1 lesion | 1 |
| CMB | Consensus definition | CMB was defined as a small (generally 2–5 mm in diameter) area of hypointensity seen on T2*/susceptibility weighted MRI. Number of deep CMBs were counted. | ≥ 1 lesion | 1 |

CSVD, cerebral small vessel disease; WMHs, white matter hyperintensities; FLAIR, fluid-attenuated inversion recovery ; PVS, perivascular space ; CMB, cerebral microbleed.

**Table S2.** Rating scale of Subjective Cognitive Decline-Questionaire 9 (SCD-Q9).

| **Item** | **Question** | **Option answer** |
| --- | --- | --- |
| 1 | Do you think you have problems with your memory? | Yes/No |
| 2 | Do you have difficulty remembering a conversation from a few days ago? | Yes/No |
| 3 | Do you have complaints about your memory in the last 2 years? | Yes/No |
| 4 | How often is the following a problem for you: Personal dates(e.g. birthdays) ? | Always//Never |
| 5 | How often is the following a problem for you : Phone or ID card numbers you use frequently? | Always/Sometimes/Never |
| 6 | On a whole, do you think that you have problems remembering things that you want to do or say ? | Yes/No |
| 7 | How often is the following a problem for you : Going to the store and forgetting what you wanted to buy? | Always/Sometimes/Never |
| 8 | Do you think that your memory is worse than 5 years ago ? | Yes/No |
| 9 | Do you feel you are forgetting where things were placed ? | Yes/No |

Note: Reference scale: for the two-category option, Yes: 1 point, No: 0 point; for the three-category option, Always: 1 point, Sometimes: 0.5 points, Never: 0 points. The final total score is the total of 9 item score(s) added together.
